# Supplementary material for: The microbiome of the marine flatworm Macrostomum lignano provides fitness advantages and exhibits circadian rhythmicity
Source: Springer Nature journal article supplement (doi:10.1038/s42003-023-04671-y), 2023-03-18
Supplement: 42003_2023_4671_MOESM2_ESM.pdf [file 42003_2023_4671_MOESM2_ESM.pdf]

## Supplementary Materials for

**The microbiome of the marine flatworm *Macrostomum lignano* provides fitness advantages and exhibits circadian rhythmicity**

by

Yuanyuan Ma, Jinru He, Michael Sieber, Jakob von Frieling, Iris Bruchhaus, John F. Baines, Ulf Bickmeyer and Thomas Roeder

This file includes Supplementary Figures S1 to S4

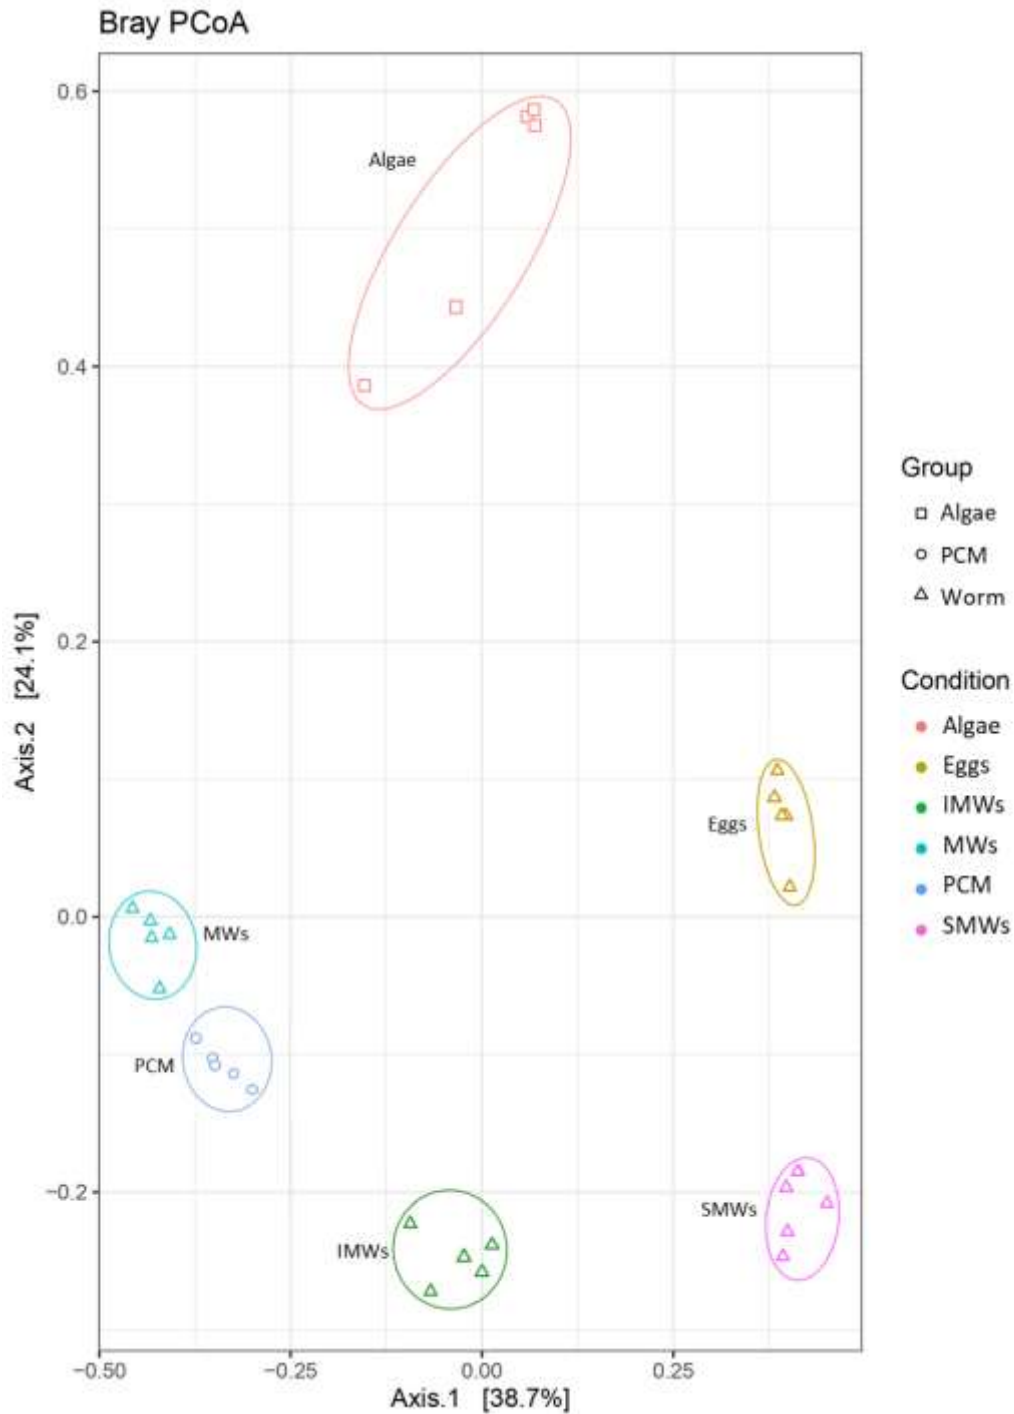

**Supplementary Figure 1: Principal coordinate analysis (PCoA) plot with Bray-Curtis dissimilarity.** The different developmental worm samples have separated from each other, which all depart from the algae medium and their living law. MWs, mature worms; SMWs, starved mature worms; IMWs, immature worms; PCM, pre-conditioned medium. The animal samples employ 5 mature or 10 immature worms with 5 biological replicates.

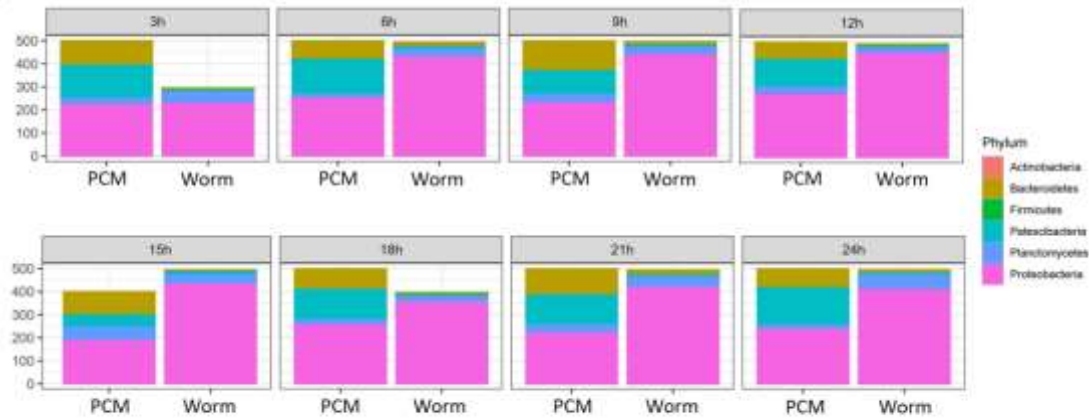

**Supplementary Figure 2: The phylum bacterial abundance of worms and their living substrate (PCM) during eight observation time points.**

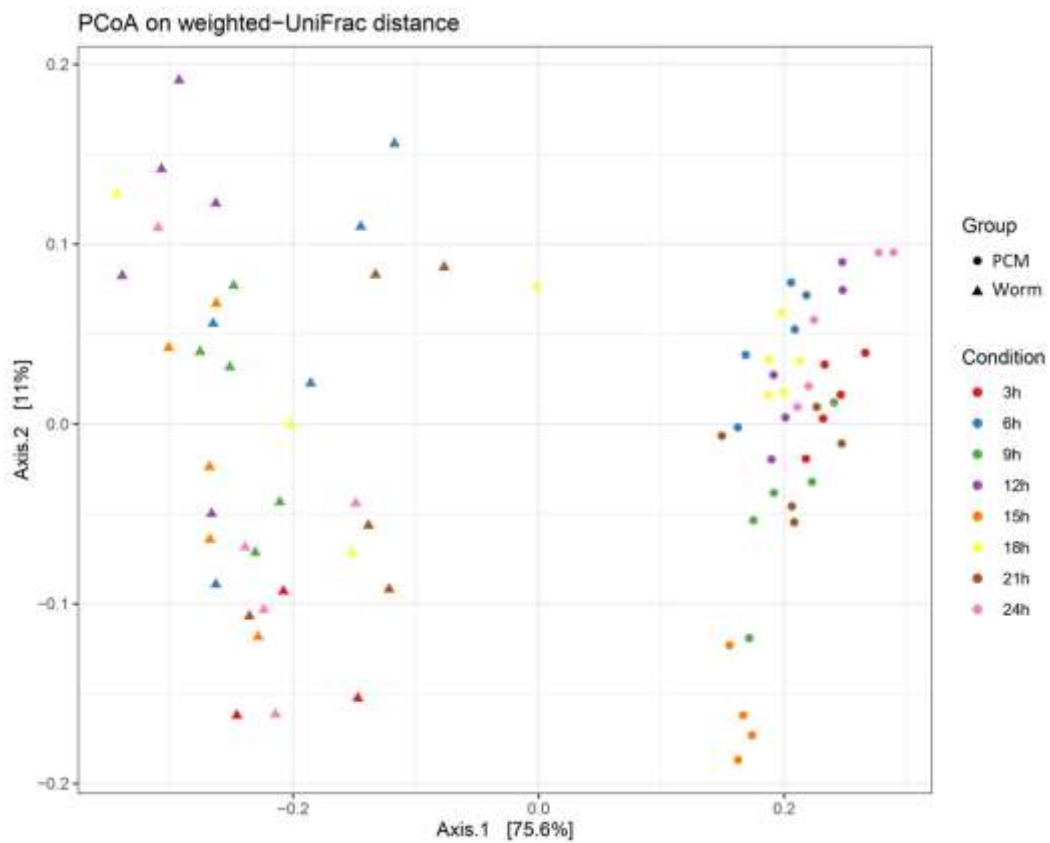

**Supplementary Figure 3: Principal coordinate analysis (PCoA) plot with weighted UniFrac distance analysis of worms and their living substrate (PCM) during eight observation time points.**

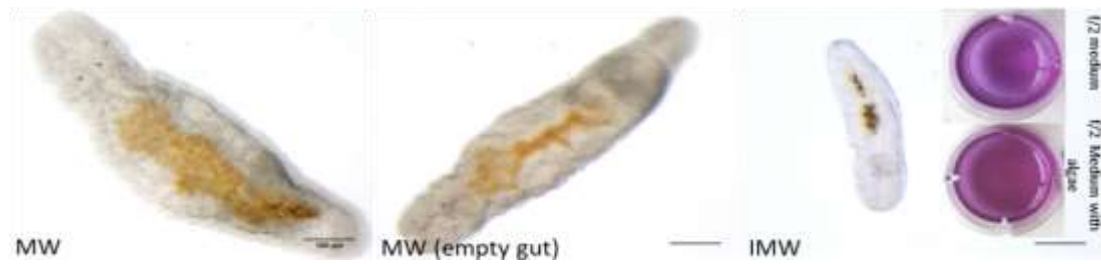

**Supplementary Figure 4: pH of *M.lignano* and medium samples.** The pH measurements by using the indicator dyes, 0.1 % m-cresol purple (657890, Merck, Sigma-Aldrich) and 0.1 % bromocresol purple (B5880, Merck, Sigma-Aldrich) at a ratio of 1:1 for 4 hours. pH indicator presents the worms' gut as yellow in color ( $5.2 \leq \text{pH} < 6.8$ ) and medium in violet ( $7.4 < \text{pH} \leq 9.0$ ). MW, mature worms; SMWs, starvation mature worms; IMW, immature worms.
