# Supplementary material for: The microbiome of the marine flatworm Macrostomum lignano provides fitness advantages and exhibits circadian rhythmicity
Source: Springer Nature journal article supplement (doi:10.1038/s42003-023-04671-y), 2023-03-18
Supplement: 42003_2023_4671_MOESM3_ESM.pdf [file 42003_2023_4671_MOESM3_ESM.pdf]

## **Description of Additional Supplementary Files**

File Name: Supplementary Data 1

Description: All amplicon sequence variants (ASVs) identified in algae and worm-associated samples.

File Name: Supplementary Data 2

Description: The nonneutral model annotation of algae samples (IMWs).

File Name: Supplementary Data 3

Description: The nonneutral model annotation of mature worms (MWs).
